# Supplementary material for: Increased Psychological Distress during COVID-19 and Quarantine in Ireland: A National Survey
Source: PubMed Central journal article supplement (PMC7693396; doi:10.3390/jcm9113481), 2020-10-28
Supplement: jcm-09-03481-s001.pdf [file jcm-09-03481-s001.pdf]

**Table S1. Effects of COVID-19 questionnaire (ECQ).**

---

The following questions ask about the effect that the COVID-19 or Corona virus is having on you.  
For each item, click on the answer that applies to you in the **PAST MONTH**.  
N/A means the item is not applicable to you.

**In the past month, how much stress have you experienced as a result of the following things**

|                             |                                                                                                                                                                            |          |           |                  |           |                     |                         |
|-----------------------------|----------------------------------------------------------------------------------------------------------------------------------------------------------------------------|----------|-----------|------------------|-----------|---------------------|-------------------------|
| 1                           | Financial hardship for you or your family arising from the COVID-19 crisis, due to job loss, or loss of earnings                                                           | N/A<br>0 | None<br>1 | A<br>little<br>2 | Some<br>3 | Quite<br>a lot<br>4 | A<br>great<br>deal<br>5 |
| 2                           | Having difficulty getting supplies when you need them, including face masks, hand sanitizers, medicines, food, drinks or other essentials                                  | N/A<br>0 | None<br>1 | A<br>little<br>2 | Some<br>3 | Quite<br>a lot<br>4 | A<br>great<br>deal<br>5 |
| 3                           | Not being able to meet with your extended family and friends                                                                                                               | N/A<br>0 | None<br>1 | A<br>little<br>2 | Some<br>3 | Quite<br>a lot<br>4 | A<br>great<br>deal<br>5 |
| 4                           | Not being able to go to your church or place of religious worship                                                                                                          | N/A<br>0 | None<br>1 | A<br>little<br>2 | Some<br>3 | Quite<br>a lot<br>4 | A<br>great<br>deal<br>5 |
| 5                           | Loss of your own, or your family's daily routine (such as sleeping patterns; meal times; work, school and recreation schedules)                                            | N/A<br>0 | None<br>1 | A<br>little<br>2 | Some<br>3 | Quite<br>a lot<br>4 | A<br>great<br>deal<br>5 |
| 6                           | Family conflict arising from the COVID19 crisis, due to arguing, or fighting with other family members more than usual because you are spending more time together at home | N/A<br>0 | None<br>1 | A<br>little<br>2 | Some<br>3 | Quite<br>a lot<br>4 | A<br>great<br>deal<br>5 |
| 7                           | Getting a lot of conflicting information and misinformation online and in the media about COVID-19                                                                         | N/A<br>0 | None<br>1 | A<br>little<br>2 | Some<br>3 | Quite<br>a lot<br>4 | A<br>great<br>deal<br>5 |
| 8                           | You, or members of your family becoming ill with COVID-19                                                                                                                  | N/A<br>0 | None<br>1 | A<br>little<br>2 | Some<br>3 | Quite<br>a lot<br>4 | A<br>great<br>deal<br>5 |
| 9                           | Worrying that you may become infected with COVID-19 and then infect other people                                                                                           | N/A<br>0 | None<br>1 | A<br>little<br>2 | Some<br>3 | Quite<br>a lot<br>4 | A<br>great<br>deal<br>5 |
| 10                          | You, or members of your family being hospitalised for COVID-19 illness                                                                                                     | N/A<br>0 | None<br>1 | A<br>little<br>2 | Some<br>3 | Quite<br>a lot<br>4 | A<br>great<br>deal<br>5 |
| 11                          | Death of a family member or very close friend as a result of COVID-19                                                                                                      | N/A<br>0 | None<br>1 | A<br>little<br>2 | Some<br>3 | Quite<br>a lot<br>4 | A<br>great<br>deal<br>5 |
| 12                          | Witnessing others in your community suffering because of COVID-19                                                                                                          | N/A<br>0 | None<br>1 | A<br>little<br>2 | Some<br>3 | Quite<br>a lot<br>4 | A<br>great<br>deal<br>5 |
| 13                          | Worrying about the effects COVID-19 on you or your family, now or in the future                                                                                            | N/A<br>0 | None<br>1 | A<br>little<br>2 | Some<br>3 | Quite<br>a lot<br>4 | A<br>great<br>deal<br>5 |
| <b>If you have children</b> |                                                                                                                                                                            |          |           |                  |           |                     |                         |
| 14                          | Your child's school closing                                                                                                                                                | N/A<br>0 | None<br>1 | A<br>little<br>2 | Some<br>3 | Quite<br>a lot<br>4 | A<br>great<br>deal<br>5 |

---

|                                                                                                                                 |                                                                                                                                                                                                    |          |           |                  |           |                     |                         |
|---------------------------------------------------------------------------------------------------------------------------------|----------------------------------------------------------------------------------------------------------------------------------------------------------------------------------------------------|----------|-----------|------------------|-----------|---------------------|-------------------------|
| 15                                                                                                                              | Helping your child keep a safe distance from their friends, or preventing them from mixing with their friends                                                                                      | N/A<br>0 | None<br>1 | A<br>little<br>2 | Some<br>3 | Quite<br>a lot<br>4 | A<br>great<br>deal<br>5 |
| 16                                                                                                                              | Helping your child keep a safe distance from members of your extended family, or preventing them from visiting with the extended family (for example grandparents)                                 | N/A<br>0 | None<br>1 | A<br>little<br>2 | Some<br>3 | Quite<br>a lot<br>4 | A<br>great<br>deal<br>5 |
| 17                                                                                                                              | Helping your child avoid crowded places, and activities that they like, such as going to sports or musical events, scouts or guides, clubs, the playground, or to church                           | N/A<br>0 | None<br>1 | A<br>little<br>2 | Some<br>3 | Quite<br>a lot<br>4 | A<br>great<br>deal<br>5 |
| 18                                                                                                                              | Helping your child to not shake hands, hug, or touch other people                                                                                                                                  | N/A<br>0 | None<br>1 | A<br>little<br>2 | Some<br>3 | Quite<br>a lot<br>4 | A<br>great<br>deal<br>5 |
| 19                                                                                                                              | Helping your child to wash or sanitise their hands regularly                                                                                                                                       | N/A<br>0 | None<br>1 | A<br>little<br>2 | Some<br>3 | Quite<br>a lot<br>4 | A<br>great<br>deal<br>5 |
| 20                                                                                                                              | Helping your child to remember to cough or sneeze into their elbow                                                                                                                                 | N/A<br>0 | None<br>1 | A<br>little<br>2 | Some<br>3 | Quite<br>a lot<br>4 | A<br>great<br>deal<br>5 |
| 21                                                                                                                              | Being worried that your child will catch COVID-19 because they have an underlying medical condition such as cancer or asthma, that makes them vulnerable to severe illness if they become infected | N/A<br>0 | None<br>1 | A<br>little<br>2 | Some<br>3 | Quite<br>a lot<br>4 | A<br>great<br>deal<br>5 |
| <b>If you have aging parents</b>                                                                                                |                                                                                                                                                                                                    |          |           |                  |           |                     |                         |
| 22                                                                                                                              | Worrying that your aging parents will become lonely during the COVID-19 crisis                                                                                                                     | N/A<br>0 | None<br>1 | A<br>little<br>2 | Some<br>3 | Quite<br>a lot<br>4 | A<br>great<br>deal<br>5 |
| 23                                                                                                                              | Worrying that you aging parents will not get supplies during the COVID-19 crisis                                                                                                                   | N/A<br>0 | None<br>1 | A<br>little<br>2 | Some<br>3 | Quite<br>a lot<br>4 | A<br>great<br>deal<br>5 |
| 24                                                                                                                              | Worrying that your aging parents will become infected with COVID-19                                                                                                                                | N/A<br>0 | None<br>1 | A<br>little<br>2 | Some<br>3 | Quite<br>a lot<br>4 | A<br>great<br>deal<br>5 |
| 25                                                                                                                              | Worrying that your aging parents will not receive adequate medical care if they become infected with COVID-19                                                                                      | N/A<br>0 | None<br>1 | A<br>little<br>2 | Some<br>3 | Quite<br>a lot<br>4 | A<br>great<br>deal<br>5 |
| <b>In the past month, how much has your experience of the COVID 19 crisis led you to feel grateful for the following things</b> |                                                                                                                                                                                                    |          |           |                  |           |                     |                         |
| 26                                                                                                                              | Your health, and the health of your family                                                                                                                                                         | N/A<br>0 | None<br>1 | A<br>little<br>2 | Some<br>3 | Quite<br>a lot<br>4 | A<br>great<br>deal<br>5 |
| 27                                                                                                                              | Your relationships with your extended family and friends                                                                                                                                           | N/A<br>0 | None<br>1 | A<br>little<br>2 | Some<br>3 | Quite<br>a lot<br>4 | A<br>great<br>deal<br>5 |
| 28                                                                                                                              | Your job                                                                                                                                                                                           | N/A<br>0 | None<br>1 | A<br>little<br>2 | Some<br>3 | Quite<br>a lot<br>4 | A<br>great<br>deal<br>5 |
| 29                                                                                                                              | Attending social, sports, and cultural events                                                                                                                                                      | N/A<br>0 | None<br>1 | A<br>little<br>2 | Some<br>3 | Quite<br>a lot<br>4 | A<br>great<br>deal<br>5 |
| 30                                                                                                                              | Your community                                                                                                                                                                                     | N/A<br>0 | None<br>1 | A<br>little<br>2 | Some<br>3 | Quite<br>a lot<br>4 | A<br>great<br>deal<br>5 |

|    |                                                                                            |          |           |                  |           |                     |                         |
|----|--------------------------------------------------------------------------------------------|----------|-----------|------------------|-----------|---------------------|-------------------------|
| 31 | Your child's regular attendance at school                                                  | N/A<br>0 | None<br>1 | A<br>little<br>2 | Some<br>3 | Quite<br>a lot<br>4 | A<br>great<br>deal<br>5 |
| 32 | Your child's relationships with their friends                                              | N/A<br>0 | None<br>1 | A<br>little<br>2 | Some<br>3 | Quite<br>a lot<br>4 | A<br>great<br>deal<br>5 |
| 33 | Your child's involvement in activities such as sports,<br>music, scouts, guides, clubs etc | N/A<br>0 | None<br>1 | A<br>little<br>2 | Some<br>3 | Quite<br>a lot<br>4 | A<br>great<br>deal<br>5 |
| 34 | Your aging parents health and safety                                                       | N/A<br>0 | None<br>1 | A<br>little<br>2 | Some<br>3 | Quite<br>a lot<br>4 | A<br>great<br>deal<br>5 |

**Note:** Items 1–13 COVID-19 personal stress scale. Items 14–21 COVID-19 parenting stress scale. Items 22–25 COVID-19 aging parents stress scale. Items 26–33 COVID-19 gratitude scale. To get a scale score, sum scores of items in the scale and divide this by the number of items which did not have an N/A response.

**Table S2.** Mean and Standard Deviation of the Psychological Outcome Measures for the total cohort, and the stratified group membership.

|                        |                              | <b>Total Cohort (<i>n</i> = 847)</b> | <b>Parent to a child (<i>n</i> = 269)*</b> | <b>Older aging parent (<i>n</i> = 433)</b> | <b>Neither (<i>n</i> = 145)</b> |
|------------------------|------------------------------|--------------------------------------|--------------------------------------------|--------------------------------------------|---------------------------------|
| Psychological Outcomes | BIPQ Cognitive               | 29.94 ± 5.21                         | 29.85 ± 5.31                               | 30.07 ± 5.22                               | 29.76 ± 5.05                    |
|                        | DASS Stress                  | 11.99 ± 7.74                         | 11.41 ± 7.40                               | 12.46 ± 8.00                               | 11.62 ± 7.49                    |
|                        | DASS Anxiety                 | 5.39 ± 5.87                          | 4.71 ± 5.71                                | 5.82 ± 5.88                                | 5.34 ± 6.04                     |
|                        | DASS Depression              | 7.46 ± 7.78                          | 6.59 ± 6.81                                | 8.12 ± 8.04                                | 7.09 ± 8.54                     |
|                        | (Quarantine) DASS Stress     | 12.86 ± 9.09                         | 11.73 ± 8.63                               | 13.45 ± 9.24                               | 13.20 ± 9.33                    |
|                        | (Quarantine) DASS Anxiety    | 6.02 ± 6.86                          | 5.29 ± 6.67                                | 6.63 ± 7.12                                | 5.56 ± 6.26                     |
|                        | (Quarantine) DASS Depression | 10.54 ± 9.46                         | 9.14 ± 8.74                                | 11.41 ± 7.12                               | 10.51 ± 9.89                    |
|                        | WEMWBS                       | 53.98 ± 10.14                        | 54.16 ± 10.06                              | 53.91 ± 9.91                               | 53.86 ± 11.01                   |
|                        | ECQ—Personal                 | 19.41 ± 7.85                         | 20.25 ± 7.74                               | 19.14 ± 7.85                               | 18.63 ± 7.96                    |
|                        | ECQ—Parent                   | -                                    | 10.43 ± 6.74                               | -                                          | -                               |
|                        | ECQ—OAP                      | 6.47 ± 4.91                          | 7.09 ± 4.61                                | 8.20 ± 4.11                                | -                               |
|                        | ECQ—Gratitude                | 18.84 ± 6.42                         | 23.85 ± 6.71                               | 17.44 ± 4.35                               | 13.56 ± 4.72                    |
|                        | BIPQ—Knowledge               | 7.80 ± 1.76                          | 7.88 ± 1.87                                | 7.75 ± 1.74                                | 7.76 ± 1.59                     |
|                        | BIPQ—Emotional               | 6.12 ± 2.29                          | 6.03 ± 2.34                                | 6.15 ± 2.24                                | 6.21 ± 2.32                     |

ECQ: Effects of COVID-19 Questionnaire; OAP; Older Aging Parent; WEMWBS: Warwick-Edinburgh Mental Wellbeing Scale; BIPQ: Brief Illness Perception Questionnaire; DASS: Depression Anxiety Stress Scale; **Note:** Quarantine refers to the period of time where participants were invited to complete the DASS-21 during the period of government-imposed restrictions; 'Neither' refers to neither a child nor an older aging parent. \*Of which, *n*=33 only have a child as illustrated in Figure 1.

**Table S3.** Correlations for the psychological outcome variables for the Total Group and the stratification of those who had neither a child nor an older aging parent.

| Variables |            |          | 1        | 2      | 3      | 4        | 5       | 6         | 7          | 8      | 9       | 10         | 11      | 12      | 13     | 14      |    |            |
|-----------|------------|----------|----------|--------|--------|----------|---------|-----------|------------|--------|---------|------------|---------|---------|--------|---------|----|------------|
| 1         | ECQ        | <i>r</i> | ECQ      | -      | -      | .200*    | -.268*  | .288**    | .285**     | .315** | .367**  | .368**     | .341**  | .377**  | -.103  | .446**  | 1  | ECQ        |
|           | Personal   | <i>p</i> | Personal | -      | -      | .027     | .003    | .002      | .002       | <.001  | <.001   | <.001      | <.001   | <.001   | .262   | <.001   |    | Personal   |
| 2         | ECQ Parent | <i>r</i> | -        | ECQ    | -      | -        | -       | -         | -          | -      | -       | -          | -       | -       | -      | -       | 2  | ECQ Parent |
|           |            | <i>p</i> | -        | Parent | -      | -        | -       | -         | -          | -      | -       | -          | -       | -       | -      | -       |    |            |
| 3         | ECQ OAP    | <i>r</i> | .411**   | -      | ECQ    | -        | -       | -         | -          | -      | -       | -          | -       | -       | -      | -       | 3  | ECQ OAP    |
|           | Distress   | <i>p</i> | <.001    | -      | OAP    | -        | -       | -         | -          | -      | -       | -          | -       | -       | -      | -       |    | Distress   |
| 4         | ECQ        | <i>r</i> | .247**   | -      | .312** | ECQ      | .239**  | .162      | -.053      | .016   | .007    | .024       | .005    | .028    | -.017  | .044    | 4  | ECQ        |
|           | Grateful   | <i>p</i> | <.001    | -      | <.001  | Grateful | .008    | .076      | .567       | .861   | .940    | .794       | .959    | .757    | .857   | .634    |    | Grateful   |
| 5         | WEMWBS     | <i>r</i> | -.342**  | -      | -      | .048     | WEM-    | .080      | -.545**    | -      | -.333** | -.581**    | -.453** | -.394** | .128   | -.382** | 5  | WEMWBS     |
|           |            | <i>p</i> | <.001    | -      | .144** | .181     | WBS     | .382      | <.001      | .391** | <.001   | <.001      | <.001   | <.001   | .161   | <.001   |    |            |
| 6         | BIPQ       | <i>r</i> | .296**   | -      | .127** | .138**   | -.064   | BIPQ      | -.105      | -.125  | -.129   | .079       | .170    | .087    | .253** | .387**  | 6  | BIPQ       |
|           | Cognitive  | <i>p</i> | <.001    | -      | <.001  | <.001    | .078    | Cognitive | .251       | .172   | .158    | .387       | .062    | .341    | .005   | <.001   |    | Cognitive  |
| 7         | DASS       | <i>r</i> | .202**   | -      | .111** | -.044    | -.372** | -.002     | DASS       | .752** | .626**  | .678**     | .502**  | .484**  | -.217* | .354**  | 7  | DASS       |
|           | Depression | <i>p</i> | <.001    | -      | .002   | .226     | <.001   | .957      | Depression | <.001  | <.001   | <.001      | <.001   | <.001   | .017   | <.001   |    | Depression |
| 8         | DASS       | <i>r</i> | .254**   | -      | .142** | .036     | -.249** | .049      | .691**     | DASS   | .731**  | .461**     | .567**  | .509**  | -.146  | .262**  | 8  | DASS       |
|           | Stress     | <i>p</i> | <.001    | -      | <.001  | .312     | <.001   | .172      | <.001      | Stress | <.001   | <.001      | <.001   | <.001   | .109   | .004    |    | Stress     |
| 9         | DASS       | <i>r</i> | .274**   | -      | .149** | -.011    | -.228** | .023      | .590**     | .681** | DASS    | .424**     | .488**  | .719**  | -.179* | .216*   | 9  | DASS       |
|           | Anxiety    | <i>p</i> | <.001    | -      | <.001  | .763     | <.001   | .519      | <.001      | <.001  | Anxiety | <.001      | <.001   | <.001   | .049   | .017    |    | Anxiety    |
| 10        | Quarantine | <i>r</i> | .391**   | -      | .183** | -.011    | -.631** | .125**    | .552**     | .389** | .379**  | DASS       | .780**  | .650**  | -.187* | .525**  | 10 | Quarantine |
|           | Depression | <i>p</i> | <.001    | -      | <.001  | .754     | <.001   | .001      | <.001      | <.001  | <.001   | Depression | <.001   | <.001   | .040   | <.001   |    | Depression |
| 11        | Quarantine | <i>r</i> | .476**   | -      | .244** | .037     | -.542** | .158**    | .405**     | .513** | .420**  | .731**     | DASS    | .727**  | -.183* | .507**  | 11 | Quarantine |
|           | Stress     | <i>p</i> | <.001    | -      | <.001  | .306     | <.001   | <.001     | <.001      | <.001  | <.001   | <.001      | Stress  | <.001   | .044   | <.001   |    | Stress     |

Neither Child nor OAP

|    |            |          |        |   |        |        |         |        |         |        |        |         |        |            |       |        |    |            |
|----|------------|----------|--------|---|--------|--------|---------|--------|---------|--------|--------|---------|--------|------------|-------|--------|----|------------|
| 12 | Quarantine | <i>r</i> | .458** | - | .247** | .044   | -.417** | .116** | .383**  | .410** | .630** | .649**  | .717** | DASS       | -.140 | .410** | 12 | Quarantine |
|    | Anxiety    | <i>p</i> | <.001  | - | <.001  | .222   | <.001   | .001   | <.001   | <.001  | <.001  | <.001   | <.001  | Anxiety    | .127  | <.001  |    | Anxiety    |
| 13 | Understand | <i>r</i> | .005   | - | -.016  | .077*  | .123**  | .283** | -.116** | -.059  | -.017  | -.105** | -.062  | Quarantine | -.011 | .029   | 13 | Understand |
|    | COVID      | <i>p</i> | .884   | - | .667   | .032   | .001    | <.001  | .001    | .099   | .632   | .004    | .086   | COVID      | .752  | .752   |    | COVID      |
| 14 | Emotional  | <i>r</i> | .531** | - | .220** | .133** | -.457** | .392** | .248**  | .294** | .286** | .485**  | .501** | .466**     | .082* | .029   | 14 | Emotional  |
|    | Impact     | <i>p</i> | <.001  | - | <.001  | .002   | <.001   | <.001  | <.001   | <.001  | <.001  | <.001   | <.001  | <.001      | .023  | .023   |    | Impact     |

**Shading:** shaded upper segment reflects participants with neither a child nor an aging parent (listwise, n=121); lower quadrant reflects total cohort (listwise n=769). **Abbreviations:** ECQ: Effects of COVID-19 Questionnaire; OAP; Older Aging Parent; WEMWBS: Warwick-Edinburgh Mental Wellbeing Scale; BIPQ: Brief Illness Perception Questionnaire; DASS: Depression Anxiety Stress Scale; *r*: correlation coefficient; *p*: significance value; **Note:** Quarantine refers to the period of time where participants were invited to complete the DASS-21 during the period of government-imposed restrictions; \* *p*<.05; \*\**p*<.001;.

**Table S4.** Correlations for the psychological outcome variables stratified by those who were parents of children, as well as participants with older aging parents.

| Variables |            |          | 1        | 2       | 3      | 4        | 5       | 6      | 7       | 8      | 9       | 10      | 11      | 12      | 13     | 14      |       |            |
|-----------|------------|----------|----------|---------|--------|----------|---------|--------|---------|--------|---------|---------|---------|---------|--------|---------|-------|------------|
| 1         | ECQ        | <i>r</i> | ECQ      | -       | .600** | .258**   | -.365** | .315** | .210**  | .256** | .257**  | .390**  | .488*   | .434**  | .032   | .583**  | 1     | ECQ        |
|           | Personal   | <i>p</i> | Personal | -       | <.001  | <.001    | <.001   | <.001  | <.001   | <.001  | <.001   | <.001   | <.001   | <.001   | <.001  | .524    | <.001 |            |
| 2         | ECQ Parent | <i>r</i> | .506**   | ECQ     | -      | -        | -       | -      | -       | -      | -       | -       | -       | -       | -      | -       | 2     | ECQ Parent |
|           |            | <i>p</i> | <.001    | Parent  | -      | -        | -       | -      | -       | -      | -       | -       | -       | -       | -      | -       | -     |            |
| 3         | ECQ OAP    | <i>r</i> | .433**   | .308**  | ECQ    | .261**   | -.232** | .217** | .139**  | 1.58** | .205**  | .244**  | .359**  | .321**  | .029   | .409**  | 3     | ECQ OAP    |
|           | Distress   | <i>p</i> | <.001    | <.001   | OAP    | <.001    | <.001   | <.001  | .005    | .002   | <.001   | <.001   | <.001   | <.001   | .563   | <.001   |       | Distress   |
| 4         | ECQ        | <i>r</i> | .285**   | .328**  | .201** | ECQ      | .075    | .244** | -.031   | .061   | .045    | .003    | .077    | .064    | .059   | .167**  | 4     | ECQ        |
|           | Grateful   | <i>p</i> | <.001    | <.001   | .001   | Grateful | .133    | <.001  | .542    | .221   | .366    | .946    | .123    | .199    | .238   | .001    |       | Grateful   |
| 5         | WEMWBS     | <i>r</i> | -.346**  | -.415** | -.140* | -.039    | WEM-    | -.115* | -.332** | -      | -.204** | -.659** | -.594** | -.465** | .134** | -.495** | 5     | WEMWBS     |
|           |            | <i>p</i> | <.001    | <.001   | .027   | .540     | WBS     | .021   | <.001   | .232** | <.001   | <.001   | <.001   | <.001   | .008   | <.001   |       |            |

Parents of Children<sup>s</sup>

Participants with OAP

|    |            |          |        |        |        |        |         |           |            |        |         |            |            |            |        |           |    |             |
|----|------------|----------|--------|--------|--------|--------|---------|-----------|------------|--------|---------|------------|------------|------------|--------|-----------|----|-------------|
| 6  | BIPQ       | <i>r</i> | .281** | .205** | .149*  | .158*  | -.044   | BIPQ      | .038       | .101*  | .086    | .147**     | .127*      | .092       | .253** | .376**    | 6  | BIPQ        |
|    | Cognitive  | <i>p</i> | <.001  | .001   | .019   | .012   | .490    | Cognitive | .452       | .044   | .085    | .003       | .011       | .065       | <.001  | <.001     |    | Cognitive   |
| 7  | DASS       | <i>r</i> | .154*  | .196** | .101   | -.015  | -.346** | -.023     | DASS       | .698** | .584**  | .501**     | .367**     | .358**     | -.090  | .218**    | 7  | DASS        |
|    | Depression | <i>p</i> | .015   | .002   | .111   | .818   | <.001   | .717      | Depression | <.001  | <.001   | <.001      | <.001      | <.001      | .071   | <.001     |    | Depression  |
| 8  | DASS       | <i>r</i> | .237** | .250** | .185** | .117   | -.210** | .035      | .639**     | DASS   | .681**  | .365**     | .473**     | .364**     | -.036  | .280**    | 8  | DASS Stress |
|    | Stress     | <i>p</i> | <.001  | <.001  | .003   | .066   | .001    | .581      | <.001      | Stress | <.001   | <.001      | <.001      | <.001      | .468   | <.001     |    | Stress      |
| 9  | DASS       | <i>r</i> | .286** | .254** | .177** | .077   | -.214** | -.019     | .573**     | .650** | DASS    | .365**     | .383**     | .578**     | -.006  | .265**    | 9  | DASS        |
|    | Anxiety    | <i>p</i> | <.001  | <.001  | .005   | .227   | .001    | .767      | <.001      | <.001  | Anxiety | <.001      | <.001      | <.001      | .913   | <.001     |    | Anxiety     |
| 10 | Quarantine | <i>r</i> | .442** | .445** | .227** | .109   | -.616** | .106      | .567**     | .384** | .354**  | DASS       | .737**     | .686**     | -.101* | .495**    | 10 | Quarantine  |
|    | Depression | <i>p</i> | <.001  | <.001  | <.001  | .086   | <.001   | .095      | <.001      | <.001  | <.001   | Depression | <.001      | <.001      | .043   | <.001     |    | Depression  |
|    |            |          |        |        |        |        |         |           |            |        |         | Quarantine |            |            |        |           |    |             |
| 11 | Quarantine | <i>r</i> | .552** | .520** | .280** | .164** | -.500** | .203**    | .415**     | .553** | .433**  | .683**     | DASS       | .720**     | -.099* | .493**    | 11 | Quarantine  |
|    | Stress     | <i>p</i> | <.001  | <.001  | <.001  | .009   | <.001   | .001      | <.001      | <.001  | <.001   | <.001      | Stress     | <.001      | .048   | <.001     |    | Stress      |
|    |            |          |        |        |        |        |         |           |            |        |         |            | Quarantine |            |        |           |    |             |
| 12 | Quarantine | <i>r</i> | .562** | .456** | .274** | .163** | -.349** | .166**    | .369**     | .438** | .675**  | .568**     | .704**     | DASS       | -.028  | .459**    | 12 | Quarantine  |
|    | Anxiety    | <i>p</i> | <.001  | <.001  | <.001  | .010   | <.001   | .009      | <.001      | <.001  | <.001   | <.001      | <.001      | Anxiety    | .584   | <.001     |    | Anxiety     |
|    |            |          |        |        |        |        |         |           |            |        |         |            |            | Quarantine |        |           |    |             |
| 13 | Understand | <i>r</i> | .005   | -.019  | -.060  | .137*  | .107    | .335**    | -.108      | -.056  | .042    | -.070      | .054       | .068       | BIPQ   | .079      | 13 | Understand  |
|    | COVID      | <i>p</i> | .935   | .754   | .344   | .031   | .091    | <.001     | .088       | .378   | .506    | .268       | .397       | .283       | COVID  | .117      |    | COVID       |
| 14 | Emotional  | <i>r</i> | .504** | .353** | .186** | .211** | -.435** | .414**    | .244**     | .332** | .355**  | .453**     | .513**     | .507**     | .109   | BIPQ      | 14 | Emotional   |
|    | Impact     | <i>p</i> | <.001  | <.001  | .003   | .001   | <.001   | <.001     | <.001      | <.001  | <.001   | <.001      | <.001      | <.001      | .086   | Emotional |    | Impact      |

**Shading:** shaded upper segment reflects participants with only an older aging parent i.e., no children (listwise, n=399); lower quadrant reflects parent cohort (listwise n=249). **Abbreviations:** ECQ: Effects of COVID-19 Questionnaire; OAP; Older Aging Parent; WEMWBS: Warwick-Edinburgh Mental Wellbeing Scale; BIPQ: Brief Illness Perception Questionnaire; DASS: Depression Anxiety Stress Scale; *r*: correlation coefficient; *p*: significance value; **Note:** Quarantine refers to the period of time where participants were invited to complete the DASS-21 during the period of government-imposed restrictions; \*  $p < 0.05$ ; \*\*  $p < 0.001$ ; †Of which, n=33 only have a child as illustrated in Figure 1.
